# Supplementary material for: Seneca Valley Virus, a Systemically Deliverable Oncolytic Picornavirus, and the Treatment of Neuroendocrine Cancers
Source: PubMed Central journal article supplement — J Natl Cancer Inst. Author manuscript; Available in PMC 2017 Jan 24. (PMC5261858; doi:10.1093/jnci/djm198), 2007-10-30
Supplement: NIHMS476864-supplement-Suppl_Tables.pdf [file NIHMS476864-supplement-Suppl_Tables.pdf]

Supplementary Table 1. Cell lines used in the study\*

| <b>Name and type of cell line</b> | <b>Source</b> |
|-----------------------------------|---------------|
| H446 (SCLC)                       | ATCC, DTPTR   |
| H187 (SCLC)                       | Minna JD      |
| H82 (SCLC)                        | Minna JD      |
| H209 (SCLC)                       | Minna JD      |
| H69AR (SCLC)                      | ATCC          |
| HCC33 (SCLC)                      | Minna JD      |
| H1184 (SCLC)                      | Minna JD      |
| H1963 (SCLC)                      | Minna JD      |
| DMS153 (SCLC)                     | ATCC          |
| H378 (SCLC)                       | Minna JD      |
| H2107 (SCLC)                      | Minna JD      |
| H526 (SCLC)                       | Minna JD      |
| H289 (SCLC)                       | Minna JD      |
| DMS114 (SCLC)                     | ATCC          |
| DMS53 (SCLC)                      | ATCC          |
| H1339 (SCLC)                      | Minna JD      |
| H69 (SCLC)†                       | DTPTR         |
| H2195 (SCLC)                      | Minna JD      |
| DMS79 (SCLC)                      | ATCC          |
| H146 (SCLC)                       | ATCC          |
| H1618 (SCLC)                      | ATCC          |
| H345 (SCLC)                       | ATCC          |
| H1514 (SCLC)                      | Minna JD      |
| H1770 (NSCLC)                     | Minna JD      |
| H1299 (NSCLC)                     | ATCC          |
| H460 (NSCLC)†                     | DTPTR         |
| HOP-62 (NSCLC)†                   | DTPTR         |
| EKVX (NSCLC)†                     | DTPTR         |
| HOP-92 (NSCLC)†                   | DTPTR         |
| H522 (NSCLC)†                     | DTPTR         |
| H23 (NSCLC)†                      | DTPTR         |
| H322M (NSCLC)†                    | DTPTR         |
| H226 (NSCLC)†                     | DTPTR         |
| A549 (NSCLC)†                     | DTPTR         |
| H727 (NSCLC)                      | ATCC          |
| H835 (NSCLC)                      | ATCC          |
| UMC-11 (NSCLC)                    | ATCC          |
| Y79 (Retinoblastoma)              | ATCC          |
| SK-NEP-1 (Wilms' tumor)           | ATCC          |
| IMR-32 (Neuroblastoma)†           | ATCC          |
| D283Med (Medulloblastoma)         | ATCC          |
| SK-N-MC (Neuroepithelioma)        | ATCC          |

---

|                                       |               |
|---------------------------------------|---------------|
| WERI-RB1 (Retinoblastoma)             | ATCC          |
| SK-N.AS (Neuroblastoma)               | ATCC          |
| SK-N-SH (Neuroblastoma)               | ATCC          |
| DAOY (Medulloblastoma)                | ATCC          |
| SW-13 (Small cell adenocarcinoma)     | ATCC          |
| H295R (Adrenocortical carcinoma)      | ATCC          |
| H295 (Adrenocortical carcinoma)       | ATCC          |
| AsPC-1 (Pancreatic carcinoma)         | ATCC          |
| BxPC-3 (Pancreatic carcinoma)         | ATCC          |
| Hep3B (Hepatocellular carcinoma)      | ATCC          |
| HepG2 (Hepatocellular carcinoma)      | ATCC          |
| 5637 (Bladder carcinoma)              | ATCC          |
| Hs578T (Breast carcinoma)             | GTI, Novartis |
| NCI/ADR-RES (Breast carcinoma)†       | DTPTR         |
| MCF7 (Breast carcinoma)†              | DTPTR         |
| MDA-MB-231 (Breast carcinoma)†        | DTPTR         |
| MDA-MB-435 (Breast ductal carcinoma)† | DTPTR         |
| BT-549 (Breast ductal carcinoma)†     | DTPTR         |
| T-47D (Breast ductal carcinoma)†      | DTPTR         |
| HeLa (Cervical carcinoma)             | ATCC          |
| HT-29 (Colon adenocarcinoma)†         | DTPTR         |
| COLO 205 (Colon adenocarcinoma)†      | DTPTR         |
| HCC-2998 (Colon carcinoma)†           | DTPTR         |
| KM12 (Colon carcinoma)†               | DTPTR         |
| HCT 116 (Colon carcinoma)†            | DTPTR         |
| HCT-15 (Colon carcinoma)†             | DTPTR         |
| SW620 (Colon carcinoma)†              | DTPTR         |
| TK-10 (Kidney carcinoma)†             | DTPTR         |
| RXF 393 (Kidney carcinoma)†           | DTPTR         |
| UO-31 (Kidney carcinoma)†             | DTPTR         |
| SN12C (Kidney carcinoma)†             | DTPTR         |
| A-498 (Kidney carcinoma)†             | DTPTR         |
| ACHN (Kidney carcinoma)†              | DTPTR         |
| 786-O (Kidney clear cell carcinoma)†  | DTPTR         |
| Caki-1 (Kidney clear cell carcinoma)† | DTPTR         |
| SW839 (Kidney clear cell carcinoma)   | ATCC          |
| M059K (Glioblastoma)                  | ATCC          |
| SF-268 (Glioblastoma)†                | DTPTR         |
| SNB-75 (Astrocytoma)†                 | DTPTR         |
| SF295 (Glioblastoma)†                 | DTPTR         |
| U251 (Glioblastoma)†                  | DTPTR         |
| SF-539 (Glioblastoma)†                | DTTR          |
| SNB-19 (Glioblastoma)†                | DTPTR         |
| KK (Glioblastoma)                     | GTI, Novartis |

---

---

|                                                        |                        |
|--------------------------------------------------------|------------------------|
| U-118MG (Glioblastoma, Astrocytoma)†                   | DTPTR                  |
| OVCAR-3 (Ovarian adenocarcinoma)†                      | ATCC, DTPTR            |
| OVCAR-4 (Ovarian adenocarcinoma)†                      | DTPTR                  |
| OVACR-5 (Ovarian adenocarcinoma)†                      | DTPTR                  |
| OVCAR-8 (Ovarian adenocarcinoma)†                      | DTPTR                  |
| SK-OV-3 (Ovarian adenocarcinoma)†                      | DTPTR                  |
| IGR-OV1 Ovarian carcinoma)†                            | DTPTR                  |
| K-562 (Chronic myelogenous leukemia)†                  | ATCC, DTPTR            |
| RPMI 8226 (Plasmacytoma)†                              | DTPTR                  |
| HL-60(TB) (Promyleocytic leukemia)†                    | DTPTR                  |
| CCRF-CEM (Acute lymphoblastic leukemia)†               | DTPTR                  |
| MOLT-4 (Acute lymphoblastic leukemia)†                 | DTPTR                  |
| SR (Large cell lymphoblastic leukemia)†                | DTPTR                  |
| PC-3 (Prostate adenocarcinoma)†                        | ATCC, DTPTR            |
| LNCAP.FGC (Prostate adenocarcinoma)                    | ATCC                   |
| DU 145 (Prostate adenocarcinoma)†                      | ATCC, DTPTR            |
| SK-MEL-2 (Melanoma)†                                   | ATCC, DTPTR            |
| SK-MEL-5 (Melanoma)†                                   | ATCC, DTPTR            |
| SK-MEL-28 (Melanoma)†                                  | ATCC, DTPTR            |
| A375.S2 (Melanoma)                                     | GTI, Novartis          |
| MALME-3M (Melanoma)†                                   | DTPTR                  |
| LOXIMVI (Melanoma)†                                    | DTPTR                  |
| UACC-62 (Melanoma)†                                    | DTPTR                  |
| UACC-257 (Melanoma)†                                   | DTPTR                  |
| M14 (Melanoma)†                                        | DTPTR                  |
| TT (Thyroid medullary carcinoma)                       | ATCC                   |
| PER.C6 (Fetal retinoblasts transformed cell line)      | Crucell                |
| HEK293 (Human fetal kidney transformed cell line)      | ATCC                   |
| Hs1.Tes (Testis cell line)†                            | DTPTR                  |
| HCN-1A (Brain cortical neuronal cells)                 | ATCC                   |
| WI-38 (Lung fibroblasts)                               | ATCC                   |
| IMR-90 (Lung fibroblasts)                              | ATCC                   |
| MRC-5 (Lung fibroblasts)                               | ATCC                   |
| PHH (Primary hepatocytes)                              | Cambrex                |
| HAEC (Heart and aortic endothelial cells)              | Cell Applications Inc. |
| HAOSMC (Heart and aortic smooth muscle cells)          | Cell Applications Inc. |
| HCAEC (Heart and coronary artery endothelial cells)    | Cell Applications Inc. |
| HCASMC (Heart and coronary artery smooth muscle cells) | Cell Applications Inc. |
| HRCE (Renal cortical epithelial cells)                 | Cambrex                |
| HRE (Renal epithelial cells)                           | Cambrex                |
| HPASMC (Lung smooth muscle cells)                      | Cell Applications Inc. |
| NHA (Brian astrocytes)                                 | Cambrex                |
| HUVEC (Umbilical vein endothelial cells)               | Cambrex                |
| HMVEC (Microvascular endothelial cells)                | Cambrex                |

---

---

|                                                       |                        |
|-------------------------------------------------------|------------------------|
| Monocytes (Isolated from human blood)                 | AllCells, LLC.         |
| PBMC (Peripheral blood mononuclear cells)             | AllCells, LLC.         |
| NIE-115 (Mouse brain neuroblastoma)                   | ATCC                   |
| BEK (Bovine embryonic kidney cells)                   | ATCC                   |
| ST (Swine testicular cells)                           | ATCC                   |
| PPASMC (Porcine pulmonary artery smooth muscle cells) | Cell Applications Inc. |
| PCASMC (Porcine carotid artery smooth muscle cells)   | Cell Applications Inc. |
| PAoSMC (Porcine aortic artery smooth muscle cells)    | Cell Applications Inc. |

---

\*SCLC = small cell lung carcinoma; NSCLC = Non-small cell lung carcinoma; ATCC = American Type Tissue Collection (Manassas, VA); DTPTR = DTP Tumor Repository at the National Cancer Institute (Frederick, MD); GTI, Novartis = Genetic Therapy Inc.(Gaithersburg, MD); Minna JD, the University of Texas Southwestern Medical Center, Dallas, TX.; Cell Applications Inc. (San Diego, CA); Cambrex (East Rutherford, New Jersey).

†XTT-based cytotoxicity assays carried out at the NCI.
